# Influence of Hypovolemia on the Pharmacokinetics and the Electroencephalographic Effect of Propofol in the Rat

Peter De Paepe, M.D.,\* Frans M. Belpaire, Ph.D.,† Marie T. Rosseel, Ph.D.,‡ Gert Van Hoey, Ph.D.,§ Paul A. Boon, M.D., Ph.D.,|| Walter A. Buylaert, M.D., Ph.D.#

**Background:** Hypovolemia decreases the dose requirement for anesthetics, but no data are available for propofol. As it is impossible to study this in patients, a rat model was used in which the influence of hypovolemia on the pharmacokinetics and pharmacodynamics of propofol was investigated.

**Methods:** Animals were randomly allocated to either a control (n = 9) or a hypovolemia (n = 9) group, and propofol was infused ( $150 \text{ mg} \cdot \text{kg}^{-1} \cdot \text{h}^{-1}$ ) until isoelectric periods of 5 s or longer were observed in the electroencephalogram. The changes observed in the electroencephalogram were quantified using aperiodic analysis and used as a surrogate measure of hypnosis. The righting reflex served as a clinical measure of hypnosis.

**Results:** The propofol dose needed to reach the electroencephalographic end point in the hypovolemic rats was reduced by 60% ( $P < 0.01$ ). This could be attributed to a decrease in propofol clearance and in distribution volume. Protein binding was similar in both groups. To investigate changes in end organ sensitivity during hypovolemia, the electroencephalographic effect versus effect-site concentration relation was studied. The effect-blood concentration relation was biphasic, exhibiting profound hysteresis in both hypovolemic and control animals. Semiparametric minimization of this hysteresis revealed similar equilibration half-lives in both groups. The biphasic effect-concentration relation was characterized by descriptors showing an increased potency of propofol during hemorrhage. The effect-site concentration at the return of righting reflex was 23% ( $P < 0.01$ ) lower in the hypovolemic animals, also suggesting an increased end organ sensitivity.

**Conclusions:** An increased hypnotic effect of propofol occurs during hypovolemia in the rat and can be attributed to changes in both pharmacokinetics and end organ sensitivity. (Key words: Anesthesia; effect-site; hemorrhage; shock.)

PROVIDING analgesia and general anesthesia to hypovolemic patients remains a major challenge. In 1943, Halford<sup>1</sup> reported an increased anesthetic-associated mortality after the administration of thiopental to hypovolemic war casualties. An observational study by Harrison<sup>2</sup> found that the induction of anesthesia in hypovolemic

patients was the most common cause of death attributed to anesthesia.

It is common clinical practice to reduce the anesthetic dose in hypovolemic patients. The rationale for this is mainly based on clinical experience and is supported by only a small number of studies. Because it is hardly possible to study this in critically ill patients, these investigations are almost exclusively performed in animals. An increased anesthetic effect during hypovolemia has been observed in animal experiments for barbiturates,<sup>3</sup> benzodiazepines,<sup>5,6</sup> and ketamine,<sup>4</sup> and we have shown an increased analgesic effect of morphine in hypovolemic rats.<sup>7</sup> The increased response to anesthetics and analgesics during hypovolemia has been ascribed to pathologic physiologic changes that alter the pharmacokinetics<sup>5,7</sup> or the pharmacodynamics (end organ sensitivity).<sup>3,5,6</sup>

For etomidate, we recently studied the influence of hypovolemia on the pharmacokinetics and the anesthetic effect in the rat in which the electroencephalogram was used as a surrogate measure of hypnosis.<sup>8</sup> An increased hypnotic effect of etomidate was observed during hypovolemia that was mainly attributed to pharmacokinetic changes with a small increase in central nervous system sensitivity for etomidate in hypovolemic animals.

We decided to study the anesthetic propofol in the same model for several reasons. Propofol is used for continuous anesthesia-sedation rather than etomidate because of the adrenocortical suppression observed with this drug. Moreover, there is much interest for target controlled infusion and closed-loop control systems using the electroencephalogram as a measure of depth of anesthesia, but there are no data available about the use of these recent techniques in hypovolemia. Finally, in contrast with etomidate, propofol is extensively bound to plasma proteins and erythrocytes,<sup>9</sup> and therefore the pharmacokinetic changes expected during hypovolemia cannot be extrapolated from the etomidate experiments.

## Materials and Methods

### Animal Instrumentation

The study protocol was approved by the Ethics Committee for Animals of the Ghent University Hospital. Male Wistar rats (310–370 g) were purchased from Iffa Credo and kept at 21°C with a 12 h–12 h light–dark cycle.

\* Research Fellow, † ‡ Professor, Heymans Institute of Pharmacology, § Research Fellow, Department of Electronics and Information Systems, Ghent University. || Professor, Electroencephalogram Laboratory, Department of Neurology, # Professor, Department of Emergency Medicine, Ghent University Hospital.

Received from the Heymans Institute of Pharmacology and the Department of Electronics and Information Systems, Ghent University, and the Departments of Neurology and Emergency Medicine, Ghent University Hospital, Ghent, Belgium. Submitted for publication March 14, 2000. Accepted for publication August 7, 2000. Supported by grants No. 011D0296 and 01104495 from Ghent University Research Foundation, Ghent University, Ghent, Belgium. Presented at the annual meeting of the Faculty of Accident and Emergency Medicine, London, United Kingdom, December 3–4, 1999.

Address reprint requests to Dr. De Paepe: Heymans Institute of Pharmacology, De Pintelaan 185, B-9000 Ghent, Belgium. Address electronic mail to: Peter.DePaepe@rug.ac.be. Individual article reprints may be purchased through the Journal Web site, [www.anesthesiology.org](http://www.anesthesiology.org).

Surgery for the instrumentation was conducted with pentobarbital anesthesia (60 mg/kg intraperitoneally).

Animals were instrumented for electroencephalographic, blood pressure, heart rate (HR), and body temperature recording as described previously.<sup>8</sup> Briefly, 1 week before the experiment, seven epidural electroencephalographic electrodes were implanted. Two days before the experiment, polyethylene catheters were inserted into the femoral artery and vein.

To minimize restraining stress during the experiments, the animals were placed in a restraining cage on several occasions before the actual experiment.

Arterial blood pressure was registered *via* the arterial line on a Beckman recorder, and HR was directly derived from the pulse signal. Data were saved on a hard disk using a hemodynamic data acquisition software system (HDAS, University of Maastricht, the Netherlands). The core temperature was measured with a flexible thermistor probe inserted rectally to a depth of 5 cm.

The electroencephalogram was measured and recorded using a D/EEG Lite electroencephalographic recorder (Telefactor, West Warwick, RI) at a sampling rate of 200 Hz. The high- and low-pass filter cutoff frequencies were set at 1 Hz and 70 Hz, respectively.

#### Experimental Protocol

After overnight fasting, the rat was loosely restrained in a cage. All experiments started between 9 and 10 AM. The arterial line was filled with 0.2 ml of heparinized saline (100 IU/ml) and connected to a blood pressure transducer. Before the experiment, all animals received an intravenous bolus dose of heparine (1 IU/g body weight).

After 20 min of baseline hemodynamic and electroencephalographic recording, the animals were randomly assigned to undergo either the control or the hypovolemia procedure. Hypovolemia was induced in nine animals by removing 30% of the initial blood volume (assumed to be 60 ml/kg) in six increments over 30 min through the arterial line. After another 30 min, the hypovolemic animals received an intravenous infusion of propofol (Diprivan 1%; AstraZeneca, Wilmington, DE). It was given at a rate of  $150 \text{ mg} \cdot \text{kg}^{-1} \cdot \text{h}^{-1}$ . The infusion was terminated when the electroencephalogram indicated burst suppression with isoelectric periods of 5 s or longer. Arterial blood samples of 100  $\mu\text{l}$  were taken for determination of propofol blood concentrations at the following time intervals: 1, 2, 3, and 4 min after the start of the infusion; at the time of termination of the infusion; and 1, 2, 4, 8, 15, 25, 35, 50, 70, 90, 120, 150, and 180 min thereafter. Sampled blood was replaced with the same volume of saline. At the end of each experiment, an arterial blood sample (500  $\mu\text{l}$ ) was withdrawn for measurement of hematocrit, blood gases, and protein concentration.

Control animals ( $n = 9$ ) underwent the same experimental protocol but without removal of blood. During

propofol infusion, blood samples were taken at 1, 2, 4, and 6 min, and the next samples were taken at the same time intervals as in the hypovolemic animals. The return of righting reflex was used as a clinical parameter of depth of anesthesia.

#### Drug Assay

Immediately after collection, whole blood samples (75  $\mu\text{l}$ ) were hemolysed in 375  $\mu\text{l}$  of deionized water, vortexed, and stored at 4°C until analysis. Concentrations of propofol in hemolysed blood (300  $\mu\text{l}$ ) were assayed by high-performance liquid chromatography according to the slightly modified method of Plummer.<sup>10</sup> Diluted blood samples were mixed with 50  $\mu\text{l}$  methanolic solution containing internal standard (thymol, 1  $\mu\text{g}/\text{ml}$ ) and 1 ml 0.025 M  $\text{KH}_2\text{PO}_4$ . After extraction with 4.5 ml of n-hexane, the organic layer was evaporated to dryness at 55°C with nitrogen, and the residue was reconstituted in the mobile phase and analyzed on a Supelco LC-8-DB column (Sigma-Aldrich, Bornem, Belgium; 15 cm  $\times$  4 mm). The mobile phase was a mixture of 23 mM  $\text{H}_3\text{PO}_4$  (pH 1.9)-acetonitrile (35:65). The flow rate was set at 1 ml/min. Detection was performed by fluorescence (excitation wavelength of 276 nm and emission wavelength of 295 nm).

The interday coefficients of variation for the determination of propofol at concentrations of 0.5, 4, and 20  $\mu\text{g}/\text{ml}$  were always less than 9.7%, and the overall accuracy ranged from 94.3% to 99.7% ( $n = 16$ ). The lower limit of quantitation of propofol was 0.1  $\mu\text{g}/\text{ml}$  using 300  $\mu\text{l}$  hemolysed blood.

#### Protein Binding

Propofol blood binding was investigated in 12 animals randomly assigned to undergo either the hypovolemia ( $n = 6$ ) or the control ( $n = 6$ ) procedure; the solvent of propofol (Intralipid 10%, Pharmacia & Upjohn, Peapack, NJ) was infused, and four arterial blood samples (600  $\mu\text{l}$ ) were taken for determination of whole blood binding of propofol at different time intervals (before the start of the infusion and at 1, 2, and 3 h after the end of the infusion).

Propofol blood binding was measured immediately after the collection of the blood samples by equilibrium dialysis for 3 h at 37°C.<sup>11</sup> Two hundred microliters of blood, spiked with 2  $\mu\text{g}/\text{ml}$  propofol and adjusted to pH 7.4, was dialysed against 200  $\mu\text{l}$  isotonic phosphate buffer (16 mM  $\text{Na}_2\text{HPO}_4$ , 4 mM  $\text{KH}_2\text{PO}_4$ , 100 mM NaCl, pH 7.4). After dialysis, propofol concentrations were determined in blood after extraction as described previously and in dialysate by direct injection on the high-performance liquid chromatography column at an excitation wavelength of 200 nm and an emission wavelength of 295 nm. A higher sensitivity for propofol at these wavelengths was obtained than at the wavelengths used for the assay in blood. The interday coefficients of vari-

ation for the determination of propofol in dialysate at concentrations of 30 and 60 ng/ml were less than 11.5%, and the overall accuracy was 103% and 110%, respectively ( $n = 6$ ). The lower limit of quantitation of propofol was 12.5 ng/ml using 100  $\mu$ l dialysate.

Blood binding was measured in duplicate in each sample. Propofol blood binding was constant over the concentration range studied (1–20  $\mu$ g/ml). After spiking blood with 2  $\mu$ g/ml propofol, propofol recovery after dialysis (sum of concentration in blood and dialysate) was 88% ( $n = 17$ ), and within-day variability of propofol free blood fraction was 6% ( $n = 5$ ). Interday variability of propofol free fraction in plasma spiked with 2  $\mu$ g/ml propofol was 11% ( $n = 6$ ). Plasma was chosen instead of blood for determination of interday variability because blood would disintegrate over the time course of the different assays.

### Analysis of Data

The pharmacokinetics and pharmacodynamics of propofol were quantified for each individual rat. The blood concentration time profiles during and after infusion were described by a polyexponential equation using Winnonlin version 1.5 (Pharsight Corp., Palo Alto, CA). Two- and three-compartmental models were evaluated, and the most suitable model was chosen according to the Akaike Information Criterion and according to the precision of the parameter estimates. Calculation of the pharmacokinetic parameters was performed according to Gibaldi and Perrier.<sup>12</sup>

Propofol drug effect was assessed from the electroencephalographic signal processed by aperiodic analysis using the amplitude per second from 11.5 Hz to 30 Hz in the left fronto-occipital lead.<sup>13</sup> The electroencephalographic data were averaged over predetermined intervals. The interval duration (10 s to 2 min) depended on the rate of change of the signals. Details about the electroencephalographic recording and processing have been reported elsewhere.<sup>14</sup> Hysteresis in the electroencephalographic effect *versus* blood concentration curve was minimized by a semiparametric approach using a FORTRAN-written program to reveal the apparent effect-site concentration–effect relation and to estimate the first-order rate equilibration constant,  $k_{eo}$ , using a first-order monoexponential equilibrium model.<sup>15</sup> Propofol blood concentration time curves were calculated based on the compartmental model obtained in each individual rat.

After hysteresis minimization, the electroencephalographic effect versus effect-site concentration curve was characterized nonparametrically with the use of descriptors without invoking a pharmacodynamic model because the parameters of the biphasic models are not estimable.<sup>16</sup> The descriptors used are the baseline effect ( $E_0$ ), the maximal activation of the electroencephalographic effect ( $E_{max}$ ), the concentration required to produce the maximal activation ( $EC_m$ ), the concentration

required to obtain 50% activation of the electroencephalographic effect ( $EC_{50}$ ), the concentration required to produce the baseline effect between maximal activation and maximal inhibition ( $EC_b$ ), and the concentrations required to obtain 50% and 90% reduction of the electroencephalographic effect below baseline ( $EC_{i,50}$  and  $EC_{i,90}$ , respectively).  $E_0$ ,  $E_{max}$ , and  $EC_m$  were directly obtained from the data, and  $EC_{50}$ ,  $EC_b$ ,  $EC_{i,50}$ , and  $EC_{i,90}$  were derived by linear interpolation between the two closest points. The propofol effect-site concentration at the return of righting reflex was also derived by linear interpolation.

### Statistical Analysis

The results are expressed as mean  $\pm$  SD. Comparison of physiologic parameters and pharmacokinetic and pharmacodynamic estimates between hypovolemic and control animals were made using multivariate multiple regression. Hemodynamic and propofol blood binding data were compared using a two-way analysis of variance for repeated measures. A  $P$  value less than 0.05 was considered statistically significant.

## Results

Eighteen animals were randomly allocated to either the control group ( $n = 9$ ) or the hypovolemia group ( $n = 9$ ). All animals fell asleep with a loss of righting reflex within the first minutes after the start of the infusion of propofol.

In the hypovolemic animals, a significantly lower dose of propofol was needed to reach the end point of 5-s isoelectric electroencephalogram ( $11.6 \pm 1.5$  mg/kg *vs.*  $29.5 \pm 7.2$  mg/kg;  $P < 0.01$ ), corresponding to a mean infusion duration of  $4.6 \pm 0.6$  and  $11.8 \pm 3.0$  min, respectively. Although we aimed to stop the infusion at a similar end point of 5-s isoelectric electroencephalogram, the duration of the isoelectric period was significantly longer in the hypovolemic animals compared with the controls ( $6.2 \pm 0.6$  s *vs.*  $5.4 \pm 0.6$  s;  $P < 0.01$ ).

Table 1 shows the mean arterial pressure (MAP) and HR in control and hypovolemic rats before, during, and after infusion of propofol. Baseline MAP and HR 1 h before the start of infusion were not different between the hypovolemia and control groups ( $129 \pm 9$  mmHg *vs.*  $130 \pm 9$  mmHg and  $457 \pm 42$  beats/min *vs.*  $465 \pm 51$  beats/min). In the hypovolemic animals, MAP decreased to a minimum of  $87 \pm 21$  mmHg at the end of the hypovolemia procedure, and then gradually increased again to  $106 \pm 15$  mmHg in the period preceding the infusion of propofol. HR remained stable during this period. In the control group, MAP and HR remained stable during the predrug period. Immediately after the start of the propofol infusion, a decrease in MAP was observed both in hypovolemic and control animals, becoming maximal at the end of the infusion. This was accompanied by a decrease in HR in both



**Table 1. Mean Arterial Blood Pressure (MAP) and Heart Rate (HR) in Control and Hypovolemic Animals before, during, and after Intravenous Infusion of Propofol**

|                              | Control<br>(n = 9) |                   | Hypovolemia<br>(n = 9) |                   |
|------------------------------|--------------------|-------------------|------------------------|-------------------|
|                              | MAP<br>(mmHg)      | HR<br>(beats/min) | MAP<br>(mmHg)          | HR<br>(beats/min) |
| At start of infusion         | 133 ± 11           | 473 ± 52          | 106 ± 15*              | 468 ± 28          |
| At end of infusion           | 78 ± 12            | 343 ± 35          | 49 ± 6*                | 340 ± 27          |
| 3 h after end of<br>infusion | 116 ± 9            | 478 ± 33          | 85 ± 9*                | 438 ± 34          |

Results are expressed as mean ± SD.

\*  $P < 0.01$  compared with the control group; two-way analysis of variance for repeated measures.

groups. At the end of the experiment, MAP was significantly lower in the hypovolemic animals compared with controls. In the control animals, HR remained stable until the end of the experiment, whereas in the hypovolemic animals, HR tended to decrease by the end of the experiment.

Hypovolemia caused a significant reduction in body temperature, arterial carbon dioxide partial pressure, plasma  $\text{HCO}_3^-$ , hematocrit, and plasma total protein compared with the control group; in contrast, the arterial oxygen partial pressure was significantly higher (table 2). Figure 1 shows the time course of both propofol blood concentrations and the electroencephalographic parameter, expressed in amplitude per second in the frequency range of 11.5–30 Hz, for a typical control rat during and after propofol infusion. Shortly after the start of infusion, at relatively low concentrations, an increase in electroencephalographic amplitude was observed. However, as the infusion continued and propofol concentrations further increased, a decrease in electroencephalographic amplitude occurred, reaching a minimum shortly after the end of infusion. After the end of

**Table 2. Effect of Hypovolemia on Some Physiologic Characteristics**

|                                       | Control<br>(n = 9) | Hypovolemia<br>(n = 9) |
|---------------------------------------|--------------------|------------------------|
| Body weight (g)                       | 345 ± 28           | 358 ± 21               |
| Temperature (°C)                      |                    |                        |
| Prestudy                              | 37.6 ± 1.8         | 37.8 ± 1.2             |
| Poststudy                             | 37.3 ± 0.6         | 35.3 ± 0.9*            |
| pH                                    | 7.44 ± 0.03        | 7.42 ± 0.06            |
| Pco <sub>2</sub> (mmHg)               | 35.8 ± 2.4         | 31.4 ± 3.7†            |
| Po <sub>2</sub> (mmHg)                | 95.6 ± 7.2         | 122.8 ± 12.4*          |
| HCO <sub>3</sub> <sup>-</sup> (mEq/l) | 24.5 ± 1.5         | 20.5 ± 2.9*            |
| Hematocrit (%)                        | 36.0 ± 2.1         | 27.6 ± 0.9*            |
| Plasma albumin (g/100 ml)             | 2.98 ± 0.33        | 2.71 ± 0.27            |
| Plasma total protein (g/100 ml)       | 5.74 ± 0.43        | 4.92 ± 0.33*           |

Results are expressed as mean ± SD.

\*  $P < 0.01$ , †  $P < 0.05$ , compared with the control group; multivariate multiple regression.

Pco<sub>2</sub> = partial pressure of carbon dioxide; Po<sub>2</sub> = partial pressure of oxygen; HCO<sub>3</sub><sup>-</sup> = bicarbonate.

infusion, propofol concentrations rapidly declined, and a second activation phase in electroencephalographic amplitude occurred that was followed by a return to baseline values.

The individual concentration-*versus*-time profiles of propofol in control and hypovolemic rats are shown in figure 2. In each rat, data were best fitted by a three-exponential model. The infusion time needed to reach the end point of 5-s isoelectric electroencephalogram was significantly shorter in the hypovolemic animals than in the controls, which is also clear from the inserted figure showing the time course of the propofol blood concentrations during the first 30 min after the start of the infusion.

The pharmacokinetic parameters of propofol for both groups of animals are shown in table 3. The maximal propofol concentration at the end of the infusion was similar in both groups. Systemic clearance and volume of distribution of the central compartment and at steady state were significantly lower in the hypovolemic animals. The initial half-life was significantly lower in the hypovolemic group. Mean residence time and intermediate and terminal half-lives were not significantly different between the two groups.

The possibility of differences in propofol blood binding between control and hypovolemic animals was investigated in additional experiments in which the free blood fraction of propofol was determined during the course of the experiment. These experiments showed that the free blood fraction of propofol during the experiment was slightly but not significantly higher in the hypovolemic animals (n = 6) compared with the controls (n = 6;  $2.0 \pm 0.0$  vs.  $1.8 \pm 0.4$ ,  $2.1 \pm 0.3$  vs.  $1.8 \pm 0.3$ ,  $2.2 \pm 0.3$  vs.  $1.9 \pm 0.3$ ,  $2.2 \pm 0.3$  vs.  $2.0 \pm 0.4$  before the

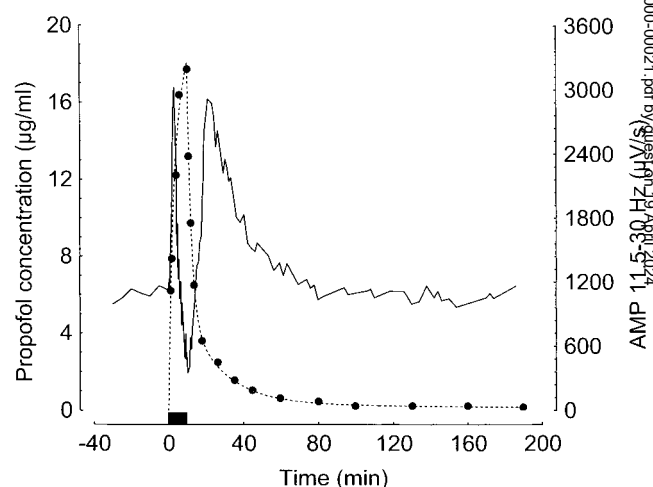

**Fig. 1. Propofol blood concentration (circles) and the electroencephalographic effect expressed as amplitude per second in the 11.5–30-Hz frequency band (solid line) over time in a typical control rat during and after propofol infusion (filled bar). The dashed line constitutes the best fit to the concentration data. AMP = amplitude.**

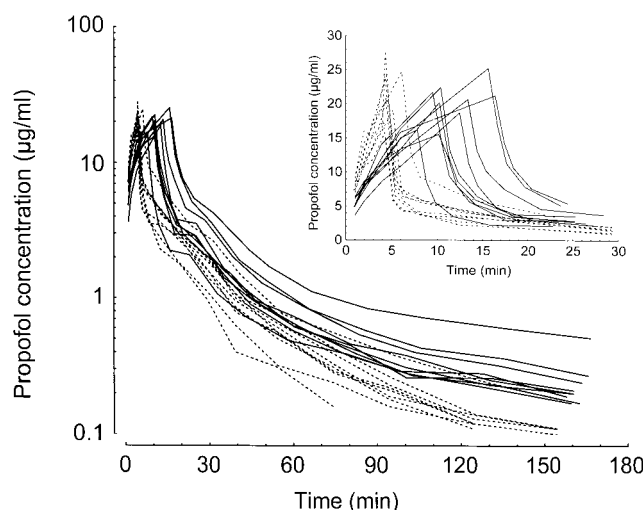

**Fig. 2.** Blood concentration of propofol as a function of time in control (solid lines;  $n = 9$ ) and hypovolemic (dotted lines;  $n = 9$ ) rats during and after an intravenous infusion of propofol ( $150 \text{ mg} \cdot \text{kg}^{-1} \cdot \text{h}^{-1}$ ). Infusion is started at time 0 and terminated when the electroencephalogram indicated burst suppression with isoelectric periods of 5 s or longer. The inserted figure shows the time course of the propofol blood concentration during the first 30 min after the start of the infusion.

start of the solvent infusion and at 1, 2, and 3 h after the end of the infusion, respectively).

The pharmacodynamics of propofol were studied by correlating the electroencephalographic effect with the propofol concentrations. When the electroencephalographic amplitude was plotted against the blood concentrations of propofol, profound hysteresis was observed in both groups as illustrated in figure 3A for the same control animal shown in figure 1. This hysteresis was collapsed for both control and hypovolemic animals by estimating  $k_{eo}$  using the hysteresis minimization program, resulting in a biphasic effect-site concentration-electroencephalographic effect relation of propofol (fig. 3B). The individual biphasic curves for both groups are

**Table 3. Effect of Hypovolemia on the Pharmacokinetic Parameters of Propofol**

|                                                                                  | Control<br>( $n = 9$ ) | Hypovolemia<br>( $n = 9$ ) |
|----------------------------------------------------------------------------------|------------------------|----------------------------|
| Dose (mg/kg)                                                                     | $29.5 \pm 7.2$         | $11.6 \pm 1.5^*$           |
| Maximal concentration ( $\mu\text{g/ml}$ )                                       | $16.9 \pm 2.1$         | $16.5 \pm 2.2$             |
| Systemic clearance<br>( $\text{ml} \cdot \text{min}^{-1} \cdot \text{kg}^{-1}$ ) | $85 \pm 9$             | $59 \pm 9^*$               |
| Volume of distribution of the<br>central compartment (l/kg)                      | $0.40 \pm 0.09$        | $0.16 \pm 0.03^*$          |
| Volume of distribution at steady<br>state (l/kg)                                 | $4.01 \pm 0.89$        | $2.11 \pm 0.75^*$          |
| Mean residence time (min)                                                        | $47.3 \pm 10.2$        | $36.9 \pm 12.1$            |
| Initial half-life (min)                                                          | $1.3 \pm 0.3$          | $0.5 \pm 0.1^*$            |
| Intermediate half-life (min)                                                     | $11.2 \pm 1.4$         | $11.5 \pm 1.7$             |
| Terminal half-life (min)                                                         | $100.4 \pm 26.2$       | $84.6 \pm 35.2$            |

Results are expressed as mean  $\pm$  SD.

\*  $P < 0.01$ , compared with the control group; multivariate multiple regression.

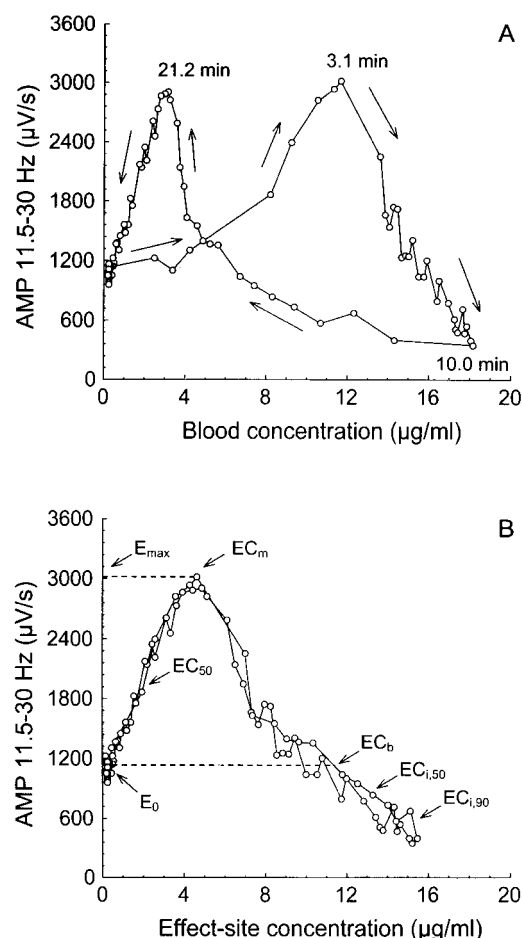

**Fig. 3.** (A) Electroencephalographic amplitude (AMP) versus propofol blood concentration in a typical control rat that received  $25.0 \text{ mg/kg}$  propofol. (B) Electroencephalographic amplitude versus propofol effect-site concentration after hysteresis minimization. Descriptors of the biphasic relation are indicated.

shown in figure 4. This biphasic relation was characterized by descriptors, which are shown in table 4 for both control and hypovolemic animals. The equilibration constant,  $k_{eo}$ , and the equilibration half-life,  $t_{1/2, k_{eo}}$ , were similar in both groups, as were the  $E_0$  and  $E_{\max}$ . The  $EC_{50}$ ,  $EC_m$ ,  $EC_b$ ,  $EC_{i,50}$ , and  $EC_{i,90}$  were lower in the hypovolemia group compared with the controls; except for  $EC_{50}$ , these differences were statistically significant. The effect-site concentration at the return of righting reflex was significantly lower in the hypovolemic animals.

## Discussion

A volume-controlled hypovolemia model in the awake rat was used to investigate the influence of hypovolemia on the pharmacokinetics and electroencephalographic effect of propofol. Removal of 30% of the estimated blood volume was used, which is considered as moderate hypovolemia.<sup>17</sup> This is reflected by the moderate physiologic changes at the end of the experiment. pH

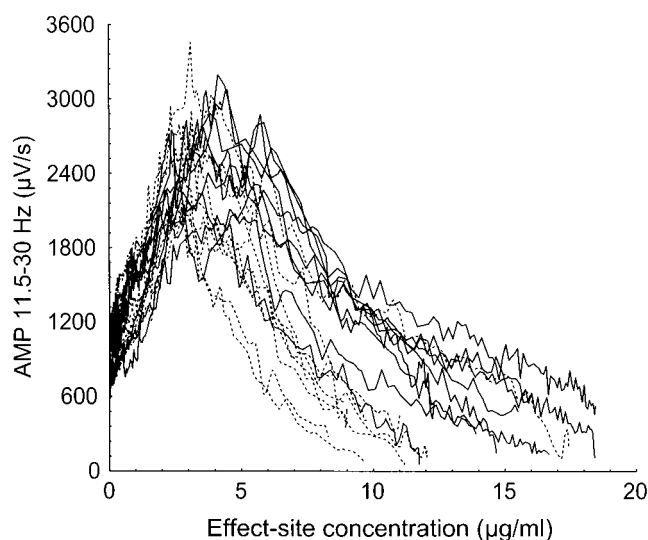

**Fig. 4.** Biphasic relation between electroencephalographic effect and apparent effect-site concentration for control (solid lines;  $n = 9$ ) and hypovolemic (dotted lines;  $n = 9$ ) rats. AMP = amplitude.

was well maintained in the hypovolemic animals as the decrease in  $\text{HCO}_3^-$  was compensated by a decrease in carbon dioxide partial pressure caused by hyperventilation, resulting in an increase of oxygen partial pressure. The reduced hematocrit and protein concentrations caused by hypovolemia can be explained by the dilutional effects of transvascular fluid shifts. Body temperature was slightly reduced in the hypovolemic animals. Blood pressure values at the start and at the end of the

**Table 4.** Pharmacodynamic Descriptors of the Biphasic Electroencephalographic Effect–Concentration Relation in Control and Hypovolemic Animals at Intravenous Infusion of Propofol

|                                                                 | Control<br>( $n = 9$ ) | Hypovolemia<br>( $n = 9$ ) |
|-----------------------------------------------------------------|------------------------|----------------------------|
| $E_0$ ( $\mu\text{V/s}$ )                                       | $910 \pm 210$          | $849 \pm 182$              |
| $\text{EC}_{50}$ ( $\mu\text{g/ml}$ )                           | $1.7 \pm 0.3$          | $1.5 \pm 0.4$              |
| $E_{\text{max}}$ ( $\mu\text{V/s}$ )                            | $2,705 \pm 384$        | $2,588 \pm 453$            |
| $\text{EC}_m$ ( $\mu\text{g/ml}$ )                              | $4.2 \pm 1.2$          | $2.8 \pm 0.3^*$            |
| $\text{EC}_b$ ( $\mu\text{g/ml}$ )                              | $11.2 \pm 2.3$         | $7.7 \pm 1.9^*$            |
| $\text{EC}_{i,50}$ ( $\mu\text{g/ml}$ )                         | $13.2 \pm 2.2$         | $9.3 \pm 2.7^*$            |
| $\text{EC}_{i,90}$ ( $\mu\text{g/ml}$ )                         | $15.0 \pm 2.3$         | $10.5 \pm 2.6^*$           |
| Concentration at return of righting reflex ( $\mu\text{g/ml}$ ) | $2.8 \pm 0.5$          | $2.2 \pm 0.3^*$            |
| $k_{\text{eo}}$ ( $\text{min}^{-1}$ )                           | $0.39 \pm 0.06$        | $0.33 \pm 0.06$            |
| $t^{1/2}_{k_{\text{eo}}}$ (min)                                 | $1.82 \pm 0.33$        | $2.14 \pm 0.39$            |

Results are expressed as mean  $\pm$  SD.

\*  $P < 0.01$ , compared with the control group; multivariate multiple regression.

$E_0$  = electroencephalographic effect at baseline;  $\text{EC}_{50}$  = concentration required to obtain 50% activation of the electroencephalographic effect;  $E_{\text{max}}$  = maximal activation of the electroencephalographic effect;  $\text{EC}_m$  = concentration required to produce maximal electroencephalographic activation;  $\text{EC}_b$  = concentration required to produce the baseline effect between maximal electroencephalographic activation and maximal electroencephalographic inhibition;  $\text{EC}_{i,50}$  = concentration required to obtain 50% reduction of the electroencephalographic effect below baseline;  $\text{EC}_{i,90}$  = concentration required to obtain 90% reduction of the electroencephalographic effect below baseline;  $k_{\text{eo}}$  = first-order rate equilibration constant;  $t^{1/2}_{k_{\text{eo}}}$  = equilibration half-life.

experiment are in agreement with the relatively mild degree of hypovolemia.

Propofol infusion was started at a fixed time interval after the induction of hypovolemia. It could be argued that equivalent levels of hypovolemia are better confirmed by pathophysiologic indices, but the model has been extensively used and showed metabolic and hemodynamic changes reproducible with time.<sup>17</sup>

After administration of propofol in control and hypovolemic animals until electroencephalographic burst suppression with isoelectric periods of 5 s or longer, MAP gradually decreased, reaching a maximum reduction at the end of the infusion that was significantly higher in the hypovolemic animals (54%) compared with the controls (41%;  $P < 0.01$ ). This hypotensive effect of propofol was also demonstrated by Yang *et al.*,<sup>18</sup> who showed that burst suppression of the electroencephalographic signal was invariably accompanied by discernible hypotension in the rat. The low blood pressure levels observed in our study were short-lasting as MAP started to increase shortly after the end of infusion in both groups. The percentage reduction in heart rate ( $\pm 30\%$ ) was identical in both groups, and recuperation occurred shortly after the end of infusion. These data are in agreement with the experience that hypovolemia potentiates the hypotensive effects of propofol.<sup>19</sup> In a study by Hoka *et al.*<sup>20</sup> after propofol administration in intact and hypovolemic rats, MAP was reduced to the same extent as in our study and was attributed mainly to an increase in vascular capacitance caused by inhibition of sympathetic vasoconstrictive activity. In a study in which we investigated the pharmacology of etomidate in hypovolemic rats,<sup>8</sup> a reduction in blood pressure of comparable magnitude occurred as with propofol in the present study. Obviously, caution should be taken when comparing these two studies as they were not conducted simultaneously and they were not intended to make a comparison between the hemodynamic effects of etomidate and propofol. Care should also be taken when extrapolating these animal data to the hypovolemic patient who often suffers from underlying diseases. It is interesting to note in this context that the use of propofol in hypovolemic patients is generally discouraged because of its pronounced hypotensive effects in these patients,<sup>21</sup> whereas etomidate is generally accepted as the drug of choice because of its more stable hemodynamic profile. However, it should be mentioned that the results of the studies comparing the hemodynamic effects of propofol with etomidate are not unequivocal.<sup>22–24</sup> No studies are currently available that compare the hemodynamic effects of propofol and etomidate in hypovolemic patients using equianesthetic doses as measured objectively by, for example, electroencephalography.

The propofol dose needed to reach approximately the same degree of electroencephalographic effect in the



hypovolemic rats as compared with the controls was reduced by 60%. A first explanation for this increased effect may be that pharmacokinetic changes occurred during hypovolemia, resulting in higher effect-site concentrations for a given dose of propofol. A second explanation is that the pharmacodynamics may be altered, resulting in an increased end organ sensitivity for propofol.

Pharmacokinetic analysis revealed that both systemic clearance and distribution volume were significantly decreased in the hypovolemic animals. The reduction in propofol clearance may be explained by a decreased hepatic blood flow during hypovolemia, as propofol is extensively cleared by the liver.<sup>9</sup> Seyde and Longnecker<sup>25</sup> showed that withdrawal of 30% of the estimated blood volume in rats resulted in a 30% reduction in liver blood flow. A reduced liver blood flow during hypovolemia was also proposed in other studies to partially explain the reduced clearance for, e.g., midazolam,<sup>6</sup> methylprednisolone succinate,<sup>26</sup> lidocaine,<sup>26</sup> prednisolone,<sup>27</sup> morphine,<sup>7</sup> etomidate,<sup>8</sup> and fentanyl.<sup>28</sup> The decreased clearance in the hypovolemic animals may also be explained by the reduction in body temperature, as hypothermia was shown to decrease the clearance of drugs such as remifentanyl and pentobarbital.<sup>29</sup> However, the decrease in body temperature in the latter studies was more pronounced than that in our experiments. Moreover, Leslie *et al.*<sup>30</sup> found that induction of mild hypothermia (34°C) in human volunteers did not change total body clearance of propofol. Hypothermia induced changes in systemic clearance are therefore unlikely to have occurred in our experiments.

The decrease in distribution volume in hypovolemic rats may be explained by a reduced organ perfusion with preservation of blood flow to more essential organs, *i.e.*, heart and brain.<sup>25</sup> The same mechanism was suggested to explain the reduced distribution volume during hypovolemia in animal experiments with lidocaine,<sup>31</sup> atropine,<sup>32</sup> prednisolone,<sup>27</sup> morphine,<sup>7</sup> etomidate,<sup>8</sup> and antipyrine.<sup>33</sup>

The hypovolemia-induced reduction in plasma albumin and formed elements of blood may also have altered the distribution of propofol, which is extensively bound to albumin and these elements.<sup>9</sup> Reduction in plasma albumin and formed elements of blood may theoretically lead to an increased free fraction of propofol, resulting in higher free concentrations and ensuing in an increased distribution volume. This possibility was investigated in experiments in which the free propofol blood fraction was measured in both control and hypovolemic rats. These experiments revealed that the free fraction was slightly but not significantly higher in the hypovolemic animals compared with the controls. Therefore, changes in free fraction do not seem to account for the increased anesthetic effect. In this context, it should be noted that in humans, propofol free fraction in blood is in the same range as that observed in our study, but in contrast with

the rat, it distributes less extensively in the formed blood elements.<sup>34</sup>

The aforementioned pharmacokinetic changes may explain the increased hypnotic effect of propofol during hypovolemia. However, this does not preclude that, in addition to the pharmacokinetic changes, alterations in end organ sensitivity may also contribute to the increased anesthetic effect of propofol. To examine this possibility, the pharmacodynamics of propofol were investigated in the present experiment by quantifying the changes in electroencephalographic amplitude in the 11.5–30-Hz frequency band, as this was shown to provide a continuous, sensitive, and objective measure of drug effect on the brain.<sup>13</sup> The applicability of the electroencephalogram in our hypovolemic animal model has been demonstrated in previous experiments,<sup>8</sup> showing that neither hypovolemia nor its accompanying hypothermia influenced the electroencephalogram. An influence of propofol-induced hypotension on the electroencephalogram was also found to be unlikely in that preliminary experiments in which the time course and degree of the hypotension was mimicked by the infusion of sodium nitroprusside showed no effect on the electroencephalogram. Consequently, the electroencephalographic changes can be considered as caused by the drug.

Relating the propofol-induced electroencephalographic effect to the propofol blood concentrations revealed a biphasic relation with profound hysteresis. A similar relation between electroencephalographic effect and propofol concentration has been demonstrated in humans.<sup>35</sup> After hysteresis minimization, the equilibration rate constant,  $k_{eo}$ , and the equilibration half-life,  $t^{1/2}_{keo}$ , both measures of the equilibration delay between blood and effect-site, were obtained. These values were not different between control and hypovolemic animals, which is an indirect proof that cerebral blood flow is similar in both groups as the rate of brain uptake of propofol is believed to be determined by the brain blood flow.<sup>36</sup> This was confirmed in a study by Werner *et al.*<sup>37</sup> that showed that propofol did not alter cerebral blood flow autoregulation within a pressure range of 50–140 mmHg and therefore, cerebral blood flow is unlikely to be depressed to a greater extent in the hypovolemic animals compared with the controls. Similar results were observed with etomidate<sup>8</sup> and other substances such as lidocaine.<sup>31</sup> The  $k_{eo}$  and  $t^{1/2}_{keo}$  values observed in our study were comparable to those found by other investigators for propofol in humans<sup>38</sup> and rats.<sup>39</sup>

After minimizing the hysteresis, the biphasic effect *versus* effect-site relation was quantified by several descriptors that allowed estimation of the potency and the intrinsic efficacy of propofol in both groups.  $EC_{50}$ ,  $EC_m$ ,  $EC_b$ ,  $EC_{i,50}$ , and  $EC_{i,90}$  were systematically lower in the hypovolemia group, indicating an increased potency of propofol during hypovolemia.  $E_{max}$  was not different between control and hypovolemic animals, indicating

that hypovolemia had no influence on the intrinsic efficacy of propofol. The fact that the more pronounced electroencephalographic effect was observed with similar peak blood concentrations is also in line with an increased end organ sensitivity in hypovolemic animals. Indeed, it should be remembered that although we aimed to stop the infusion at a similar end point of 5-s isoelectric electroencephalogram, the duration of the isoelectric period was significantly longer in the hypovolemic animals compared with the controls. This overshooting was caused by the more rapid electroencephalographic changes in the former group.

In addition to the electroencephalographic effect, the righting reflex was used as a clinical measure of depth of anesthesia. The propofol effect-site concentrations at the return of righting reflex were significantly lower in the hypovolemic animals compared with the controls, which is another argument in favor of an increased end organ sensitivity. The wake-up concentrations observed in our study were in the same range as those reported by other investigators in humans<sup>40</sup> and rats.<sup>13</sup> We therefore conclude that end organ sensitivity increased during hypovolemia. This has also been suggested for barbiturates,<sup>3</sup> benzodiazepines,<sup>5,6</sup> and etomidate.<sup>8</sup> For the first two drugs, end organ sensitivity was investigated by measuring cerebrospinal fluid concentrations at the loss of righting reflex, whereas for etomidate the same methodology was applied as in the present study. The increased end organ sensitivity may be explained by a change in physiologic processes or a release of endogenous substances that enhance the anesthetic effects of propofol during hypovolemia.  $\beta$ -Endorphins, for instance, have been shown to increase in response to hemorrhage.<sup>41</sup> Because endorphins may interfere with the  $\gamma$ -aminobutyric acid (GABA)ergic system<sup>42</sup> and because it is suggested that propofol produces anesthesia by acting at GABA<sub>A</sub> receptors,<sup>43</sup> an interaction between endorphins and propofol may be hypothesized as a possible mechanism for the increased end organ sensitivity. Hypothermia arising from hypovolemia may also influence end organ sensitivity, as hypothermia was shown to affect the pharmacodynamics of pentylene-tetrazol<sup>44</sup> and the effect-*versus*-concentration relation of alfentanil.<sup>45</sup> However, drug sensitivity during hypothermia did not increase, but rather decreased,<sup>44</sup> and hypothermia was more pronounced than in our experiments. Cerebral ischemia, which may result from propofol-induced cerebral hypoperfusion in the hypovolemic rats, cannot be excluded as a possible cause for the increased end organ sensitivity. However, this is unlikely because cerebral blood flow autoregulation during propofol anesthesia was shown to be preserved within a large pressure range, as stated earlier.

The results of this study are in line with the clinical experience that the dose of anesthetics should be reduced in hypovolemic patients. Our animal study dem-

onstrates that the decreased anesthetic requirement of propofol during hypovolemia is caused by changes in both pharmacokinetics and pharmacodynamics as reflected in the electroencephalographic parameter. These changes were observed in a relatively mild degree of hypovolemia, and care should be taken for extrapolation to hypovolemic conditions with more serious hemodynamic compromise. Obviously, caution should be taken when extrapolating our animal data to the clinical situation. Our experiments differ from the clinical situation in which fluid resuscitation is often instituted before or simultaneously with the induction of anesthesia. However, fluid resuscitation does not necessarily reverse the pharmacologic changes. Indeed, Klockowski and Levy showed that the increased end organ sensitivity of hypovolemic rats to desmethyldiazepam was not reversed by prompt replacement of blood. Our data suggest that the electroencephalogram may be an interesting tool to monitor anesthetic depth in critically ill patients as it indirectly reflects changes in both pharmacokinetics and end organ sensitivity.

The authors thank Davide Verotta, Ph.D. (Department of Pharmacy and Pharmaceutical Chemistry, University California, San Francisco, California), for providing the FORTRAN program for hysteresis minimization; Tom Loeys, M.Sc. (Department of Applied Mathematics and Informatics, Ghent University, Ghent, Belgium), for statistical assistance; and Marleen De Meulemeester, Technician (Heymans Institute of Pharmacology, Ghent University, Ghent, Belgium), for technical assistance.

## References

1. Halford FJ: A critique of intravenous anesthesia in war surgery. *ANESTHESIOLOGY* 1943; 4:67-9
2. Harrison GG: Death attributable to anaesthesia. *Br J Anaesth* 1978; 56:1041-6
3. Klockowski PM, Levy G: Kinetics of drug action in disease states. XXII. Effect of acute hypovolemia on the pharmacodynamics of phenobarbital in rats. *J Pharm Sci* 1988; 77:365-6
4. Weiskopf RB, Bogetz MS: Haemorrhage decreases the anaesthetic requirement for ketamine and thiopentone in the pig. *Br J Anaesth* 1985; 57:1022-5
5. Klockowski PM, Levy G: Kinetics of drug action in disease states. XXV. Effect of experimental hypovolemia on the pharmacodynamics and pharmacokinetics of desmethyldiazepam. *J Pharmacol Exp Ther* 1988; 245:508-12
6. Adams P, Gelman S, Reves JG, Greenblatt DJ, Alvis JM, Bradley E: Midazolam pharmacodynamics and pharmacokinetics during acute hypovolemia. *ANESTHESIOLOGY* 1985; 63:140-6
7. De Paepe P, Belpaire FM, Rosseel MT, Buylaert WA: The influence of hemorrhagic shock on the pharmacokinetics and the analgesic effect of morphine in the rat. *Fundam Clin Pharmacol* 1998; 12:624-30
8. De Paepe P, Belpaire FM, Van Hoey G, Boon PA, Buylaert WA: Influence of hypovolemia on the pharmacokinetics and the electroencephalographic effect of etomidate in the rat. *J Pharmacol Exp Ther* 1999; 290:1048-53
9. Cockshott ID, Douglas EJ, Plummer GF, Simons PJ: The pharmacokinetics of propofol in laboratory animals. *Xenobiotica* 1992; 22:369-75
10. Plummer GF: Improved method for the determination of propofol in blood by high-performance liquid chromatography with fluorescence detection. *J Chromatogr* 1987; 421:171-6
11. Alonso MJ, Bruelisauer A, Misslin P, Lemaire M: Microdialysis sampling to determine the pharmacokinetics of unbound SDZ ICM 567 in blood and brain in awake, freely-moving rats. *Pharm Res* 1995; 12:291-4
12. Gibaldi M, Perrier D: *Pharmacokinetics*. New York, Marcel Dekker, 1982
13. Cox EH, Knibbe CAJ, Koster VS, Langemeijer MWE, Tukker EE, Lange R, Kuks PFM, Langemeijer HJM, Lie-A-Huen L, Danhof M: Influence of different fat emulsion-based intravenous formulations on the pharmacokinetics and pharmacodynamics of propofol. *Pharm Res* 1998; 15:442-8
14. De Paepe P, Van Hoey G, Belpaire FM, Rosseel MT, Boon PA, Buylaert WA: Relationship between etomidate plasma concentration and EEG effect in the rat. *Pharm Res* 1999; 16:924-9
15. Verotta D, Sheiner LB: Simultaneous modeling of pharmacokinetics and pharmacodynamics: An improved algorithm. *CABIOS* 1987; 3:345-9



16. Dutta S, Matsumoto Y, Gothgen NU, Ebling WF: Concentration-EEG effect relationship of propofol in rats. *J Pharm Sci* 1997; 86:37-43
17. Crippen D, Safar P, Snyder C, Porter L: Dying pattern in volume-controlled hemorrhagic shock in awake rats. *Resuscitation* 1991; 21:259-70
18. Yang CH, Shyr MH, Kuo TBJ, Tan PPC, Chan SHH: Effects of propofol on nociceptive responses and power spectra of electroencephalographic and systemic arterial pressure signals in the rat: Correlation with plasma concentration. *J Pharmacol Exp Ther* 1995; 275:1568-74
19. Marinella MA: Propofol for sedation in the intensive care unit: Essentials for the clinician. *Respir Med* 1997; 91:505-10
20. Hoka S, Yamaura K, Takenaka T, Takahashi S: Propofol-induced increase in vascular capacitance due to inhibition of sympathetic vasoconstrictive activity. *ANESTHESIOLOGY* 1998; 89:1495-1500
21. Skinner HJ, Biswas A, Mahajan RP: Evaluation of intubating conditions with rocuronium and either propofol or etomidate for rapid sequence induction. *Anaesthesia* 1998; 53:702-10
22. Larsen R, Rathgeber J, Bagdahn A, Lange H, Rieke H: Effects of propofol on cardiovascular dynamics and coronary dynamics and coronary blood flow in geriatric patients. *Anaesthesia* 1988; 43:25-31
23. Fruergaard K, Jenstrup M, Schierbeck J, Wiberg-Jorgensen F: Total intravenous anaesthesia with propofol or etomidate. *Eur J Anaesthesiol* 1991; 8:385-91
24. Price ML, Millar B, Grounds M, Cashman J: Changes in cardiac index and estimated systemic vascular resistance during induction of anaesthesia with thiopentone, methohexitone, propofol and etomidate. *Br J Anaesth* 1992; 69:172-6
25. Seyde WC, Longnecker DE: Anesthetic influences on regional hemodynamics in normal and hemorrhaged rats. *ANESTHESIOLOGY* 1984; 61:686-98
26. Toutain PL, Autebage A, Oukessou M, Alvinerie M: Pharmacokinetics of methylprednisolone succinate, methylprednisolone, and lidocaine in the normal dog and during hemorrhagic shock. *J Pharm Sci* 1987; 76:528-34
27. Hanks GH, Lazenby LR, Ravis WR, Belmonte AA: Pharmacokinetics of prednisolone sodium succinate and its metabolites in normovolemic and hypovolemic dogs. *Am J Vet Res* 1985; 46:476-8
28. Egan TD, Kuramkote S, Gong G, Zhang J, McJames SW, Bailey PL: Fentanyl pharmacokinetics in hemorrhagic shock. *ANESTHESIOLOGY* 1999; 91:156-66
29. Boucher BA, Hanes SD: Pharmacokinetic alterations after severe head injury. *Clin Pharmacokinet* 1998; 35:209-21
30. Leslie K, Sessler DI, Bjorksten AR, Moayeri A: Mild hypothermia alters propofol pharmacokinetics and increases the duration of action of atracurium. *Anesth Analg* 1995; 80:1007-14
31. Benowitz N, Forsyth RP, Melmon KL, Rowland M: Lidocaine disposition kinetics in monkey and man II. Effects of hemorrhage and sympathomimetic drug administration. *Clin Pharmacol Ther* 1974; 16:99-109
32. Smallridge RC, Chernow B, Teich S, Kinzer C, Umstott C, Geelhoed G, Pamplin C: Atropine pharmacokinetics are affected by moderate hemorrhage and hypothyroidism. *Crit Care Med* 1989; 17:1254-7
33. Krejcie TC, Henthorn TK, Gentry WB, Niemann CU, Enders-Klein C, Shanks CA, Avram MJ: Modifications of blood volume alter the disposition of markers of blood volume, extracellular fluid, and total body water. *J Pharmacol Exp Ther* 1999; 291:1308-16
34. Mazoit JX, Samii K: Binding of propofol to blood components: Implications for pharmacokinetics and for pharmacodynamics. *Br J Clin Pharmacol* 1999; 47:35-42
35. Kuizenga K, Kalkman CJ, Hennis PJ: Quantitative electroencephalographic analysis of the biphasic concentration-effect relationship of propofol in surgical patients during extradural analgesia. *Br J Anaesth* 1998; 80:725-32
36. Dutta S, Matsumoto Y, Muramatsu A, Matsumoto M, Fukuoka M, Ebling WF: Steady-state propofol brain:plasma and brain:blood partition coefficients and the effect-site equilibration paradox. *Br J Anaesth* 1998; 81:422-4
37. Werner C, Hoffman WE, Kochs E, Schulte am Esch J, Albrecht RF: The effects of propofol on cerebral and spinal cord blood flow in rats. *Anesth Analg* 1993; 76:971-5
38. Kazama T, Ikeda K, Morita K, Kikura M, Doi M, Ikeda T, Kurita T, Nakajima Y: Comparison of the effect-site  $k_{eo}$ s of propofol for blood pressure and EEG bispectral index in elderly and younger patients. *ANESTHESIOLOGY* 1999; 90:1517-27
39. Dutta S, Ebling WF: Formulation-dependent pharmacokinetics and pharmacodynamics of propofol in rats. *J Pharm Pharmacol* 1998; 50:37-42
40. Kazama T, Ikeda K, Morita K, Sanjo Y: Awakening propofol concentration with and without blood-effect site equilibration after short-term and long-term administration of propofol and fentanyl anesthesia. *ANESTHESIOLOGY* 1998; 88:928-34
41. Molina PE, Abumrad NN: Differential effects of hemorrhage and LPS on tissue TNF- $\alpha$ , IL-1 and associate neuro-hormonal and opioid alterations. *Life Sci* 2000; 66:399-409
42. Moroni F, Cheney DL, Peralta E, Costa E: Opiate receptor agonists and modulators of  $\gamma$ -aminobutyric acid turnover in the nucleus caudatus, globus pallidus and substantia nigra of the rat. *J Pharmacol Exp Ther* 1978; 207:870-8
43. Murugaiah KD, Hemmings HC: Effects of intravenous general anesthetic on [ $^3$ H]GABA release from rat cortical synaptosomes. *ANESTHESIOLOGY* 1998; 89:919-28
44. Walker JS, Levy G: Kinetics of drug action in disease states. XXXVIII: Effect of body temperature on the convulsant activity of pentylenetetrazol in rats. *J Pharm Sci* 1991; 80:928-30
45. Cox EH, Van Hemert JGN, Tukker EJ, Danhof M: Pharmacokinetic-pharmacodynamic modelling of the EEG effect of alfentanil in rats. *J Pharmacol Toxicol Methods* 1997; 38:99-108
